# Supplementary material
Source: HighWire-hosted journal article supplement (https://jnm.snmjournals.org/highwire/filestream/95334/field_highwire_adjunct_files/0/209643_Supplemental_Data.pdf)
Supplement: 209643_Supplemental_Data.pdf [file 209643_Supplemental_Data.pdf]

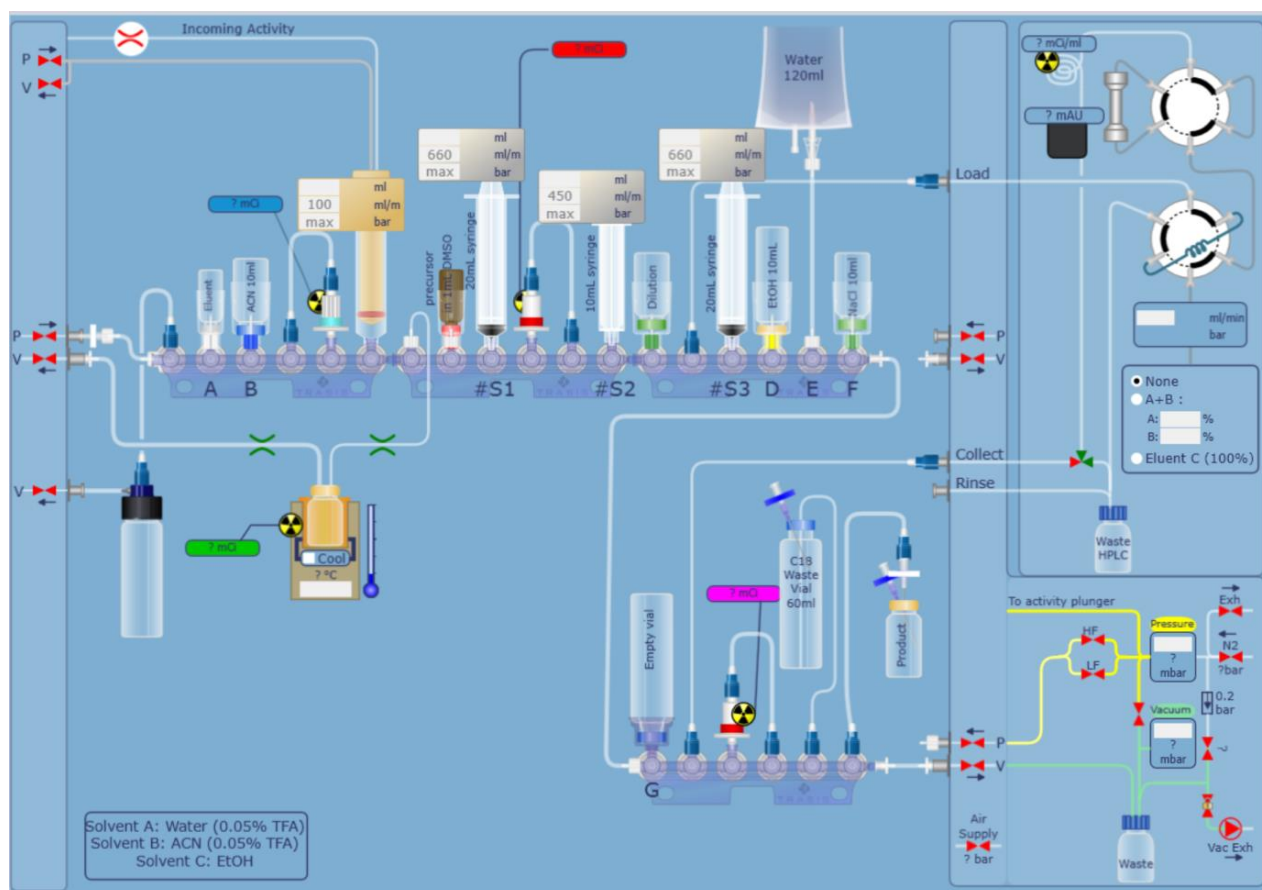

**Supplemental Figure 1.** The interface of the AllInOne™ synthesizer.

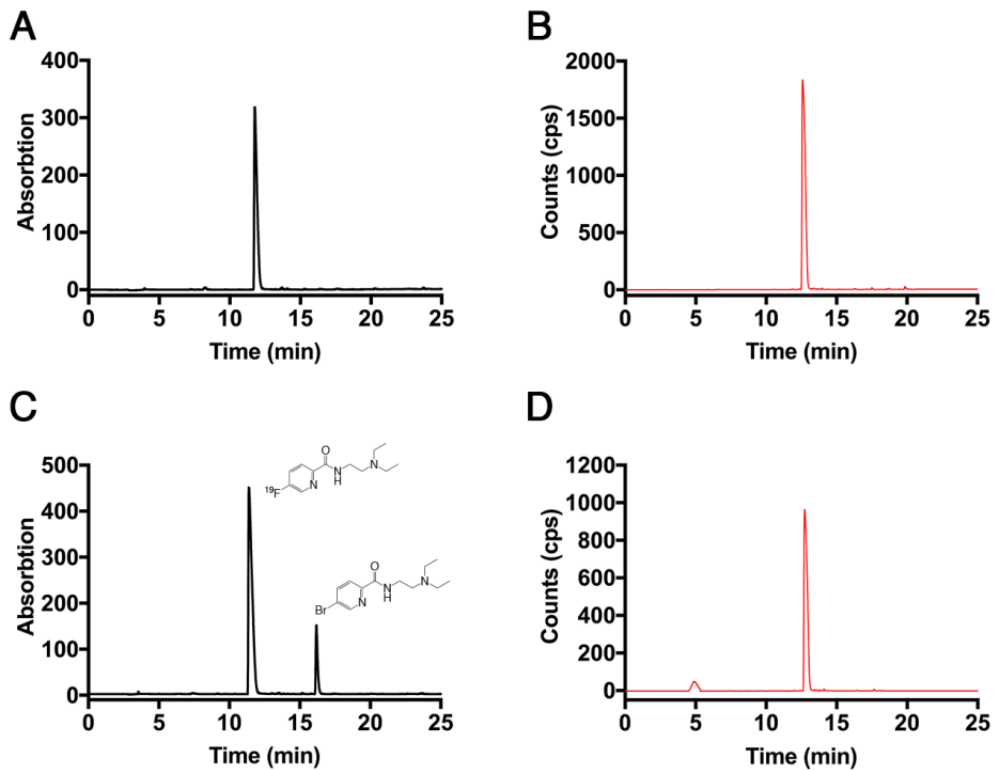

**Supplemental Figure 2.** The radio semi-preparative high-pressure liquid chromatographs of  $^{18}\text{F}$ -P3BZA. The radioactive chromatograph of  $^{18}\text{F}$ -P3BZA (A) and 254 nm absorption chromatograph of  $^{19}\text{F}$ -P3BZA (B) after co-injection. (C) The 254 nm absorption chromatograph of co-injection of P3BZA precursor and  $^{19}\text{F}$ -P3BZA. (D) The 4-hour serum stability of  $^{18}\text{F}$ -P3BZA.

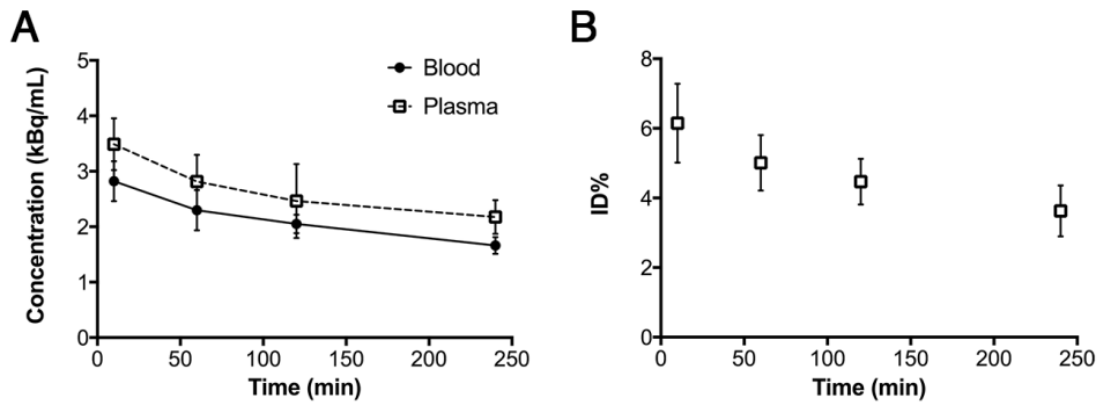

**Supplemental Figure 3.** The pharmaceutical kinetic of  $^{18}\text{F}$ -P3BZA in blood. (A) The radioactivity-time curve of  $^{18}\text{F}$ -P3BZA in whole blood and plasma. (B) The kinetic of  $^{18}\text{F}$ -P3BZA in blood.

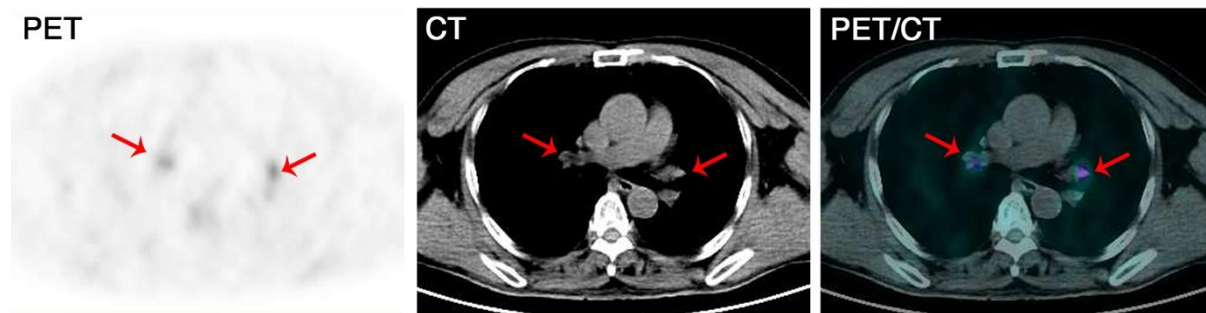

**Supplemental Figure 4.** PET/CT images of  $^{18}\text{F}$ -P3BZA distribution in obsolete lymph nodes (red arrows) in the chest.

### Supplemental Table 1 Reaction sequence for $^{18}\text{F}$ -P3BZA radiosynthesis

- 
01.  $^{18}\text{F}$  trapping on QMA cartridge
  02.  $^{18}\text{F}$  elution with 1.5 ml  $\text{K}_2\text{S}_2\text{O}_8/\text{K}_2\text{CO}_3$  solution
  03. Azeotropic evaporation at 90 °C for 3 min and 110 °C for 7 min
  04. Addition of bromo-precursor (P3BZA in 1ml anhydrous DMSO) to the reactor vial
  05. Reacting at 150 °C for 10 min
  06. Cooling the reactor vial
  07. Addition of 3 ml sterilized water
  08. Pre-purification on a C18 Plus Cartridge
  09. Elute with 2mL acetonitrile
  10. Diluted with 7 mL water
  11. Injection on HPLC
  12. Collection of  $^{18}\text{F}$ -P3BZA peak
  13. Dilution of the collected fraction with 20 ml sterilized water
  14. Trap product on a C18 plus cartridge
  15. Elute product with 1ml ethanol
  16. Formulation with 10 ml saline
  17. Sterile filtration
-

**Supplemental Table 2 PET/CT- derived distribution of <sup>18</sup>F-P3BZA in healthy volunteers**

| Organ                 | SUV <sub>mean</sub> |            |           |           |
|-----------------------|---------------------|------------|-----------|-----------|
|                       | 10 min              | 60 min     | 120 min   | 240 min   |
| Adrenals              | 1.5 ± 0.2           | 1.4 ± 0.2  | 1.1 ± 0.2 | 1.1 ± 0.2 |
| Brain                 | 3.5 ± 0.4           | 2.0 ± 0.2  | 1.7 ± 0.2 | 1.4 ± 0.2 |
| Breasts               | 0.2 ± 0.0           | 0.3 ± 0.1  | 0.3 ± 0.1 | 0.2 ± 0.1 |
| Gallbladder           | 4.8 ± 0.5           | 6.2 ± 0.8  | 4.6 ± 1.2 | 4.0 ± 0.6 |
| Lower large intestine | 2.6 ± 0.6           | 2.3 ± 0.3  | 3.0 ± 0.4 | 2.3 ± 0.3 |
| Small intestine       | 3.0 ± 0.5           | 3.2 ± 0.9  | 2.4 ± 0.4 | 1.6 ± 0.3 |
| Stomach               | 7.5 ± 1.1           | 10.9 ± 1.1 | 9.5 ± 1.3 | 4.5 ± 1.1 |
| Upper large intestine | 3.1 ± 0.5           | 2.7 ± 0.6  | 2.6 ± 0.5 | 2.4 ± 0.3 |
| Heart                 | 3.5 ± 0.5           | 2.3 ± 0.4  | 2.1 ± 0.3 | 1.7 ± 0.2 |
| Kidneys               | 4.5 ± 0.6           | 3.6 ± 0.5  | 3.2 ± 0.3 | 2.5 ± 0.3 |
| Liver                 | 8.3 ± 1.0           | 4.8 ± 1.0  | 4.0 ± 0.6 | 3.4 ± 0.7 |
| Lungs                 | 1.5 ± 0.2           | 1.3 ± 0.1  | 1.1 ± 0.1 | 0.9 ± 0.1 |
| Muscle                | 1.4 ± 0.2           | 1.3 ± 0.2  | 1.1 ± 0.1 | 0.9 ± 0.1 |
| Ovaries (n=3)         | 1.4 ± 0.3           | 1.2 ± 0.1  | 1.0 ± 0.1 | 0.5 ± 0.2 |
| Pancreas              | 3.2 ± 0.3           | 2.5 ± 0.2  | 2.0 ± 0.2 | 1.7 ± 0.2 |
| Bone marrow           | 3.2 ± 0.2           | 2.9 ± 0.3  | 2.6 ± 0.4 | 1.8 ± 0.4 |
| Spleen                | 5.1 ± 0.5           | 3.7 ± 0.7  | 3.0 ± 0.4 | 2.1 ± 0.4 |
| Testes (n=3)          | 1.4 ± 0.3           | 1.4 ± 0.5  | 1.2 ± 0.3 | 1.0 ± 0.5 |
| Thyroid               | 2.0 ± 0.4           | 1.6 ± 0.2  | 1.3 ± 0.2 | 1.1 ± 0.2 |
| Eyes                  | 1.6 ± 0.3           | 2.1 ± 0.4  | 2.4 ± 0.5 | 2.2 ± 0.3 |
